# Supplementary material for: Birthweight: EN-BIRTH multi-country validation study
Source: Springer Nature journal article supplement (doi:10.1186/s12884-020-03355-3), 2021-03-01
Supplement: MOESM4 [file 19010480]

Every Newborn BIRTH multi-country validation study: informing measurement of coverage and quality of maternal and newborn care

**Birthweight: EN-BIRTH multi-country validation study**

Additional File 4: Data collection flow, EN-BIRTH study

**EN-BIRTH study, overview of data sites**

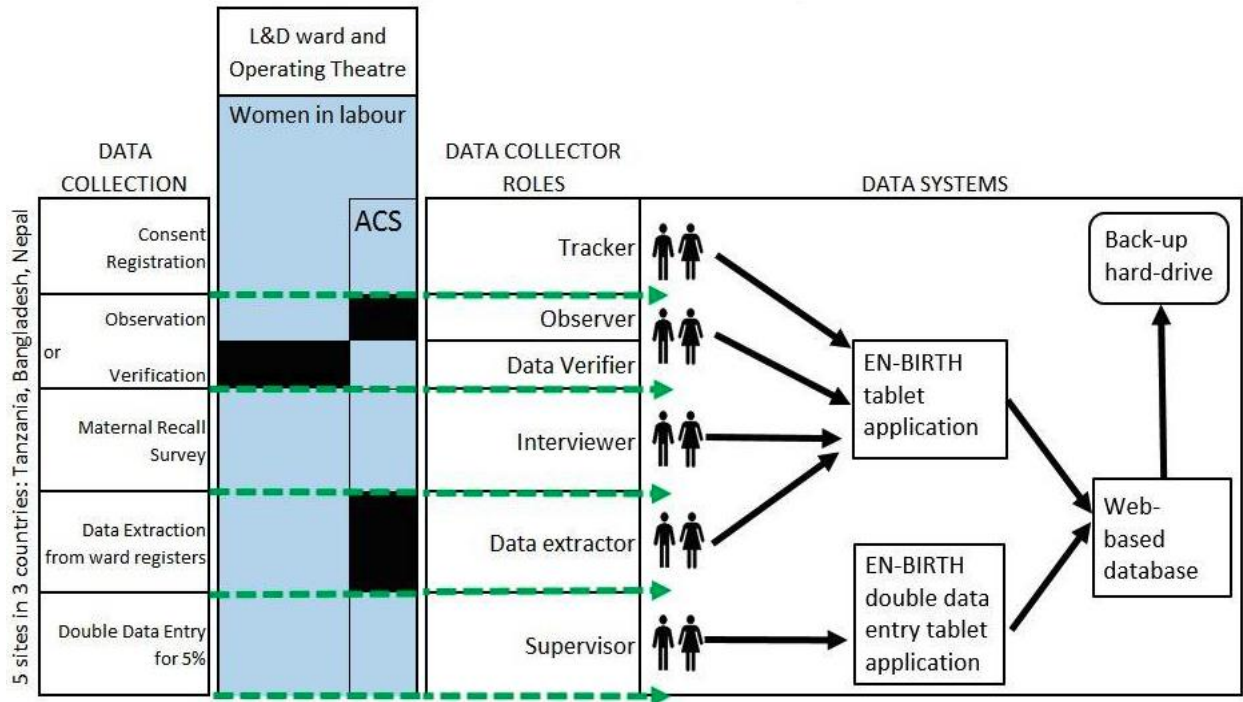

Adapted from EN-BIRTH protocol paper [1].

1. Day LT, Ruysen H, Gordeev VS, et al. "Every Newborn-BIRTH" protocol: observational study validating indicators for coverage and quality of maternal and newborn health care in Bangladesh, Nepal and Tanzania. *Journal of Global Health* 2019; 9(1).

With regards to documenting birthweight in the EN-BIRTH tablet application, the general flow of routine activities performed by health workers varies by site.

The flow of EN-BIRTH data collectors' activities are as follows:

| <b>A) Observer</b>       |                                                                                                                                                                                                                                                                     |                                                                   |
|--------------------------|---------------------------------------------------------------------------------------------------------------------------------------------------------------------------------------------------------------------------------------------------------------------|-------------------------------------------------------------------|
| <b>Description</b>       | Observer usually stands behind health worker to note down scale reading ("Weight in Gram" prompt) and type of scale.                                                                                                                                                |                                                                   |
| <b>Tablet prompt</b>     | "Birthweight measured"                                                                                                                                                                                                                                              |                                                                   |
| <b>Answer options</b>    | "YES"                                                                                                                                                                                                                                                               | If observer sees health worker weigh baby.                        |
|                          | "NO"                                                                                                                                                                                                                                                                | If observer does not see health worker weigh baby.                |
|                          | "DON'T KNOW"                                                                                                                                                                                                                                                        | If observer is unsure of whether birthweight was measured or not. |
| <b>B) Interviewer</b>    |                                                                                                                                                                                                                                                                     |                                                                   |
| <b>Description</b>       | Interviewer conducts survey to mothers whose baby's birth or treatment is observed and/or verified prior to discharge from postnatal ward. For multiple births the interview will be completed only for first-born babies.                                          |                                                                   |
| <b>Tablet prompt</b>     | "Was your baby weighed at birth"?                                                                                                                                                                                                                                   |                                                                   |
| <b>Answer options</b>    | "YES"                                                                                                                                                                                                                                                               |                                                                   |
|                          | "NO"                                                                                                                                                                                                                                                                |                                                                   |
|                          | "DON'T KNOW/DON'T REMEMBER"                                                                                                                                                                                                                                         |                                                                   |
| <b>C) Data extractor</b> |                                                                                                                                                                                                                                                                     |                                                                   |
| <b>Description</b>       | Data extractors will use routine labour/delivery registers to extract participant data recorded by facility staff. If data are illegible or cannot be found, supervisors will review/search for these documents, before documenting data not readable/not recorded. |                                                                   |
| <b>Tablet prompt</b>     | "Birth weight (grams)"                                                                                                                                                                                                                                              |                                                                   |
| <b>Answer options</b>    | XXXX (enter numerical value)                                                                                                                                                                                                                                        |                                                                   |
|                          | "NOT READABLE"                                                                                                                                                                                                                                                      |                                                                   |
|                          | "NOT RECORDABLE"                                                                                                                                                                                                                                                    |                                                                   |
