# Supplementary material for: Birthweight: EN-BIRTH multi-country validation study
Source: Springer Nature journal article supplement (doi:10.1186/s12884-020-03355-3), 2021-03-01
Supplement: MOESM7 [file 19010480]

Every Newborn BIRTH multi-country validation study: informing measurement of coverage and quality of maternal and newborn care

### Birthweight: EN-BIRTH multi-country validation study

Additional File 7: Inter-observer agreement (Kappa) for gold standard observational data, EN-BIRTH study

|                                  |                                                  | Bangladesh             |                  | Nepal            | Tanzania        |                    |      |
|----------------------------------|--------------------------------------------------|------------------------|------------------|------------------|-----------------|--------------------|------|
|                                  |                                                  | Azimpur Tertiary       | Kushtia District | Pokhara Regional | Temeke Regional | Muhimbili National |      |
|                                  |                                                  | Kappa                  | Kappa            | Kappa            | Kappa           | Kappa              |      |
| <b>Gold standard observation</b> | L&D Observation                                  | Birth Weight (grammes) | 0.99             | 0.98             | 0.98            | 0.96               | 0.99 |
|                                  |                                                  |                        |                  |                  |                 |                    |      |
| <b>Register Recorded</b>         | L&D Data Extraction                              | Birth Weight (grammes) | 0.99             | 0.99             | 0.98            | 0.94               | 0.97 |
| <b>Kappa agreement cut-offs:</b> | High/substantial for observation $\geq 0.71$     |                        | $< 0.71$         |                  |                 |                    |      |
|                                  | High/substantial for data extraction $\geq 0.91$ |                        | $< 0.91$         |                  |                 |                    |      |
