# Supplementary material for: Birthweight: EN-BIRTH multi-country validation study
Source: Springer Nature journal article supplement (doi:10.1186/s12884-020-03355-3), 2021-03-01

Every Newborn BIRTH multi-country validation study: informing measurement of coverage and quality of maternal and newborn care

**Birthweight: EN-BIRTH multi-country validation study**

Additional File 9: Weighing coverage and LBW prevalence, EN-BIRTH study (figure)

a) coverage rates for singletons and multiple babies weighed at birth, with 95% CI.

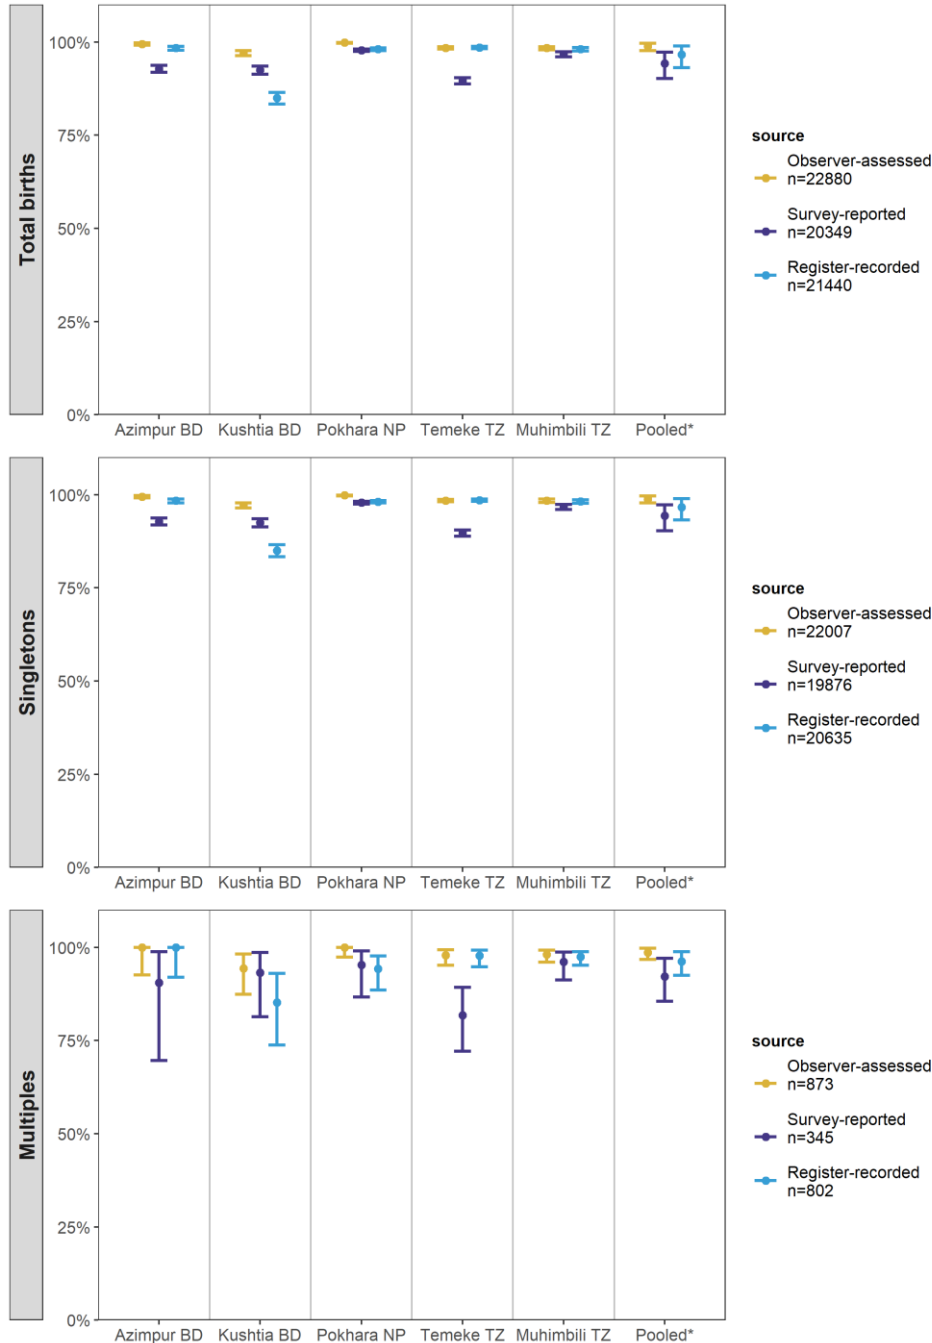

b) low birthweight prevalence of live newborns and stillborns, with 95% CI.

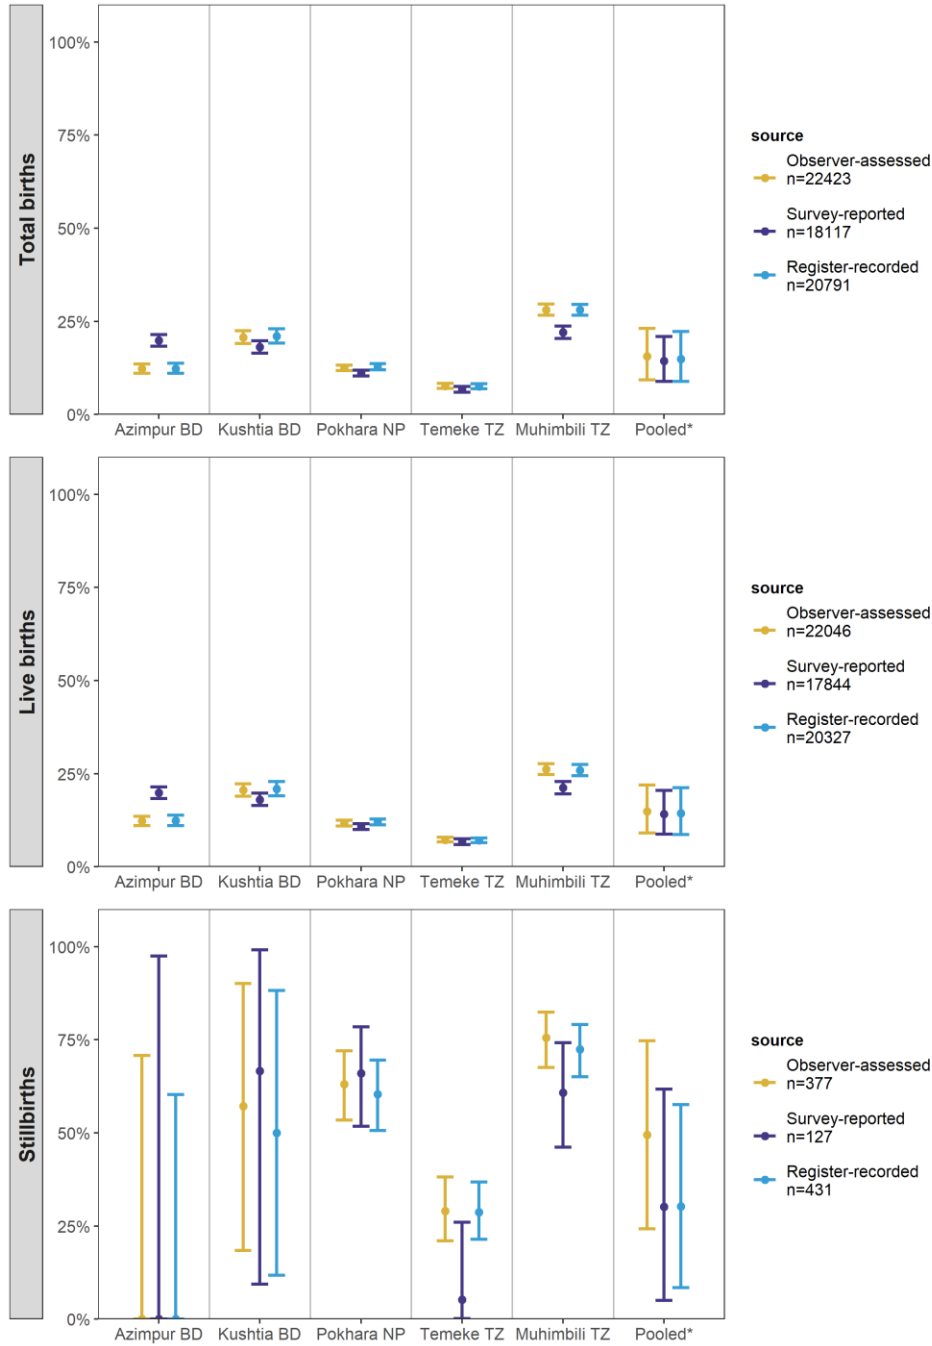

Supplement: MOESM9 [file 19010480]
