# Supplementary material for: Birthweight: EN-BIRTH multi-country validation study
Source: Springer Nature journal article supplement (doi:10.1186/s12884-020-03355-3), 2021-03-01
Supplement: MOESM11 [file 19010480]

Every Newborn BIRTH multi-country validation study: informing measurement of coverage and quality of maternal and newborn care

### Birthweight: EN-BIRTH multi-country validation study

Additional File 11: Chi-squared test results comparing EN-BIRTH weighing coverage and LBW prevalence, disaggregated

|                          |                 | Delivery mode |    |        |        | Number of babies |    |        |        | Birth outcome |    |        |        |
|--------------------------|-----------------|---------------|----|--------|--------|------------------|----|--------|--------|---------------|----|--------|--------|
|                          |                 | N             | DF | r      | p      | N                | DF | r      | p      | N             | DF | r      | p      |
| <b>Weighing Coverage</b> | <b>Survey</b>   | 20,300        | 2  | 5.27   | 0.072  | 20,221           | 4  | 6.34   | 0.175  | 20,190        | 2  | 3300   | <0.001 |
|                          | <b>Register</b> | 21,416        | 2  | 205.99 | <0.001 | 21,437           | 4  | 2.46   | 0.651  | 21,401        | 2  | 263.43 | <0.001 |
| <b>LBW</b>               | <b>Survey</b>   | 19,118        | 3  | 190.09 | <0.001 | 19,039           | 6  | 625.77 | <0.001 | 19,010        | 3  | 279.80 | <0.001 |
|                          | <b>Register</b> | 21,416        | 3  | 266.49 | <0.001 | 21,427           | 6  | 2100   | <0.001 | 21,401        | 3  | 747.38 | <0.001 |

Delivery mode: vaginal delivery or C-section

Number of babies: singleton, twins, multiples

Birth outcome: alive or stillbirth

r = Pearson product-moment correlation coefficients

DF = degrees of freedom
