# Supplementary material for: Birthweight: EN-BIRTH multi-country validation study
Source: Springer Nature journal article supplement (doi:10.1186/s12884-020-03355-3), 2021-03-01
Supplement: MOESM14 [file 19010480]

Every Newborn BIRTH multi-country validation study: informing measurement of coverage and quality of maternal and newborn care

## Birthweight: EN-BIRTH multi-country validation study

Additional File 14: Type of scales used in EN-BIRTH study

|                              | Bangladesh       |                  | Nepal            | Tanzania        |                    | All sites     |
|------------------------------|------------------|------------------|------------------|-----------------|--------------------|---------------|
|                              | Azimpur Tertiary | Kushtia District | Pokhara Regional | Temeke Regional | Muhimbili National |               |
| <b>a) All births</b>         | n (%)            |                  |                  |                 |                    |               |
| Digital-Electronic Scale     | 2142 (74.19)     | 0 (0)            | 0 (0)            | 135 (2.04)      | 1046 (29.28)       | 3323 (14.7)   |
| Analogue Scale               | 745 (25.81)      | 2289 (100)       | 7247 (100)       | 6468 (97.96)    | 2527 (70.72)       | 19276 (85.3)  |
| Total                        | 2887 (100)       | 2289 (100)       | 7247 (100)       | 6603 (100)      | 3573 (100)         | 22599 (100)   |
| <b>b) Vaginal deliveries</b> |                  |                  |                  |                 |                    |               |
| Digital-Electronic Scale     | 96 (12.72)       | 0 (0)            | 0 (0)            | 64 (1.04)       | 280 (18.26)        | 440 (2.76)    |
| Analogue Scale               | 659 (87.28)      | 1323 (100)       | 6197 (100)       | 6071 (98.96)    | 1253 (81.74)       | 15503 (97.24) |
| Total                        | 755 (100)        | 1323 (100)       | 6197 (100)       | 6135 (100)      | 1533 (100)         | 15943 (100)   |
| <b>c) Caesarean sections</b> |                  |                  |                  |                 |                    |               |
| Digital-Electronic Scale     | 2046 (95.97)     | 0 (0)            | 0 (0)            | 71 (15.2)       | 766 (37.55)        | 2883 (43.32)  |
| Analogue Scale               | 86 (4.03)        | 966 (100)        | 1050 (100)       | 396 (84.8)      | 1274 (62.45)       | 3772 (56.68)  |
| Total                        | 2132 (100)       | 966 (100)        | 1050 (100)       | 467 (100)       | 2040 (100)         | 6655 (100)    |

Total denotes babies who were observed to be weighed.
