# Supplementary material for: Birthweight: EN-BIRTH multi-country validation study
Source: Springer Nature journal article supplement (doi:10.1186/s12884-020-03355-3), 2021-03-01
Supplement: MOESM15 [file 19010480]

*Every Newborn* BIRTH multi-country validation study: informing measurement of coverage and quality of maternal and newborn care

### **Birthweight: EN-BIRTH multi-country validation study**

Additional File 15: Adjusted LBW prevalence in exit surveys and routine registers, EN-BIRTH study

|          |                  | Bangladesh        |                   | Nepal             | Tanzania        |                    |
|----------|------------------|-------------------|-------------------|-------------------|-----------------|--------------------|
|          |                  | Azimpur Tertiary  | Kushtia District  | Pokhara Regional  | Temeke Regional | Muhimbili National |
| Survey   | Unadjusted LBW % | 19.8 (18.3, 21.5) | 18.1 (16.5, 19.8) | 11.1 (10.3, 11.8) | 6.7 (6.0, 7.5)  | 22.0 (20.5, 23.7)  |
|          | Adjusted LBW %   | 21.8 (20.2, 23.5) | 21.4 (19.7, 23.2) | 14.0 (13.1, 14.8) | 9.1 (8.3, 10.0) | 23.3 (21.7, 25.0)  |
| Register | Unadjusted LBW % | 12.3 (11.0, 13.8) | 21.1 (19.2, 23.0) | 12.8 (12.0, 13.6) | 7.5 (6.9, 8.2)  | 28.1 (26.6, 29.6)  |
|          | Adjusted LBW %   | 13.5 (12.2, 15.0) | 23.9 (22.0, 25.9) | 15.5 (14.6, 16.4) | 9.6 (9.0, 10.4) | 29.2 (27.7, 30.7)  |

Adjusted LBW prevalence was calculated after re-allocating 25% of 2500g babies to be LBW. Survey n=18,116, register n=20,789.
