# Supplementary material for: Birthweight: EN-BIRTH multi-country validation study
Source: Springer Nature journal article supplement (doi:10.1186/s12884-020-03355-3), 2021-03-01

Every Newborn BIRTH multi-country validation study: informing measurement of coverage and quality of maternal and newborn care

**Birthweight: EN-BIRTH multi-country validation study**

Additional File 16: Interview results with data collectors and health workers on barriers and enablers checklist, EN-BIRTH study

**a) responsibility of health workers in documenting and giving care in labour ward**

**Data collectors**

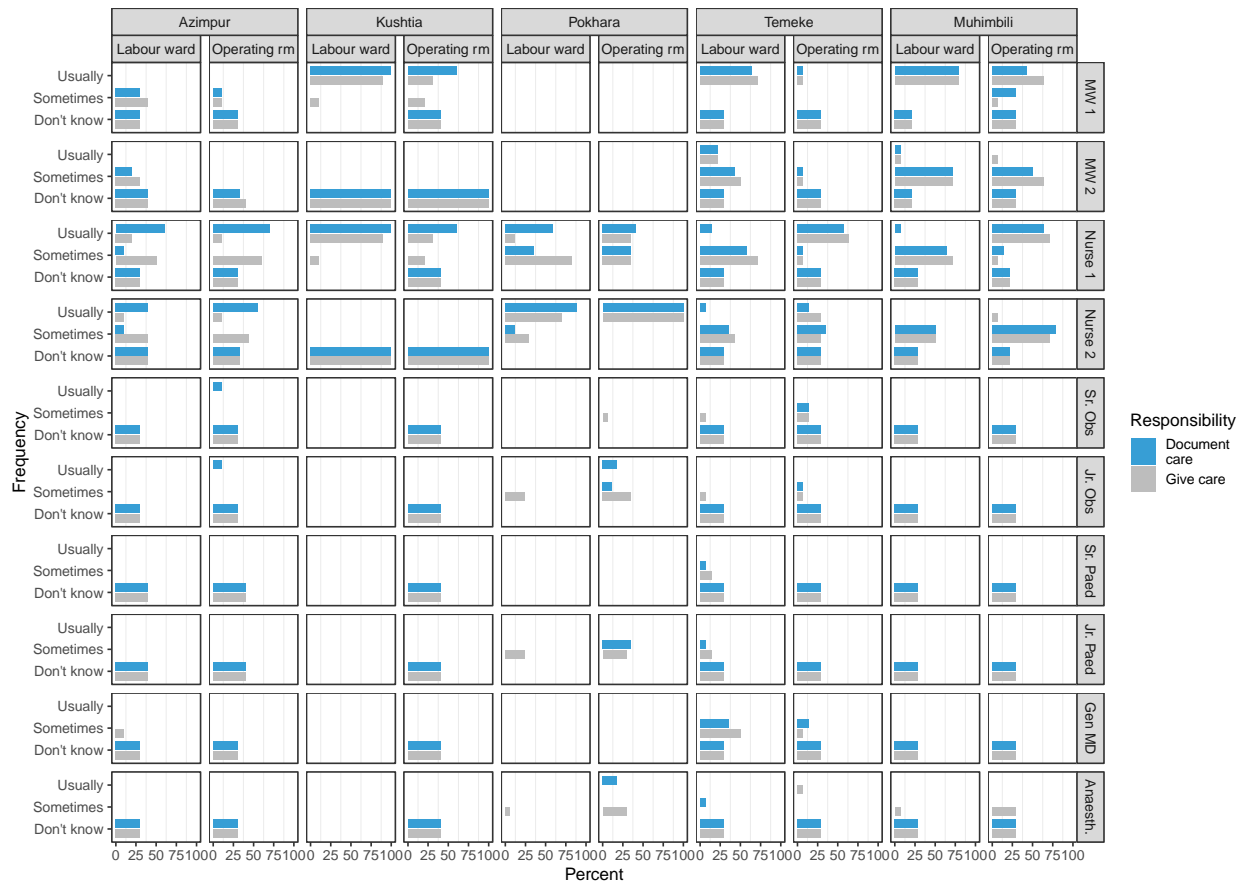

# Health workers

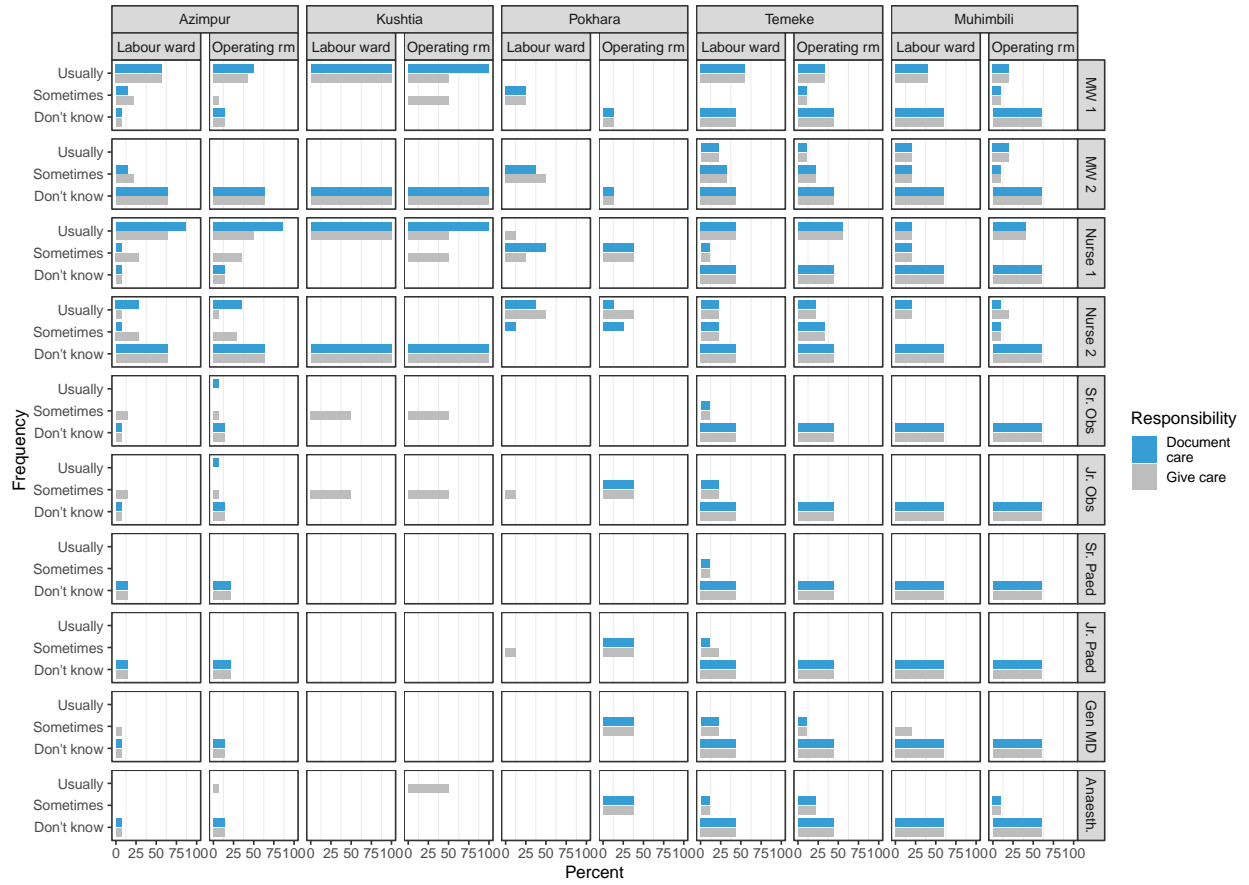

## b) order in which birthweight is documented in registers in labour ward

### Data collectors

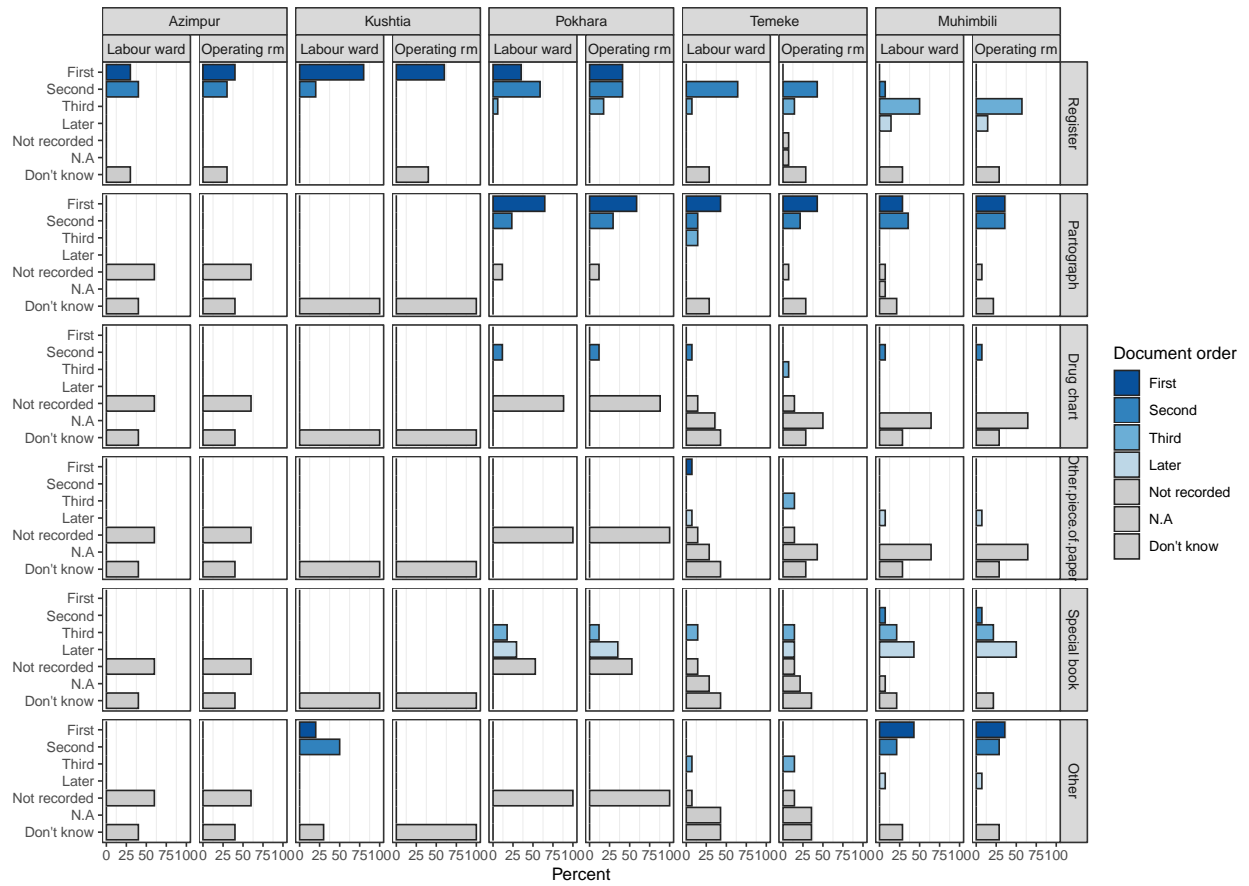

# Health workers

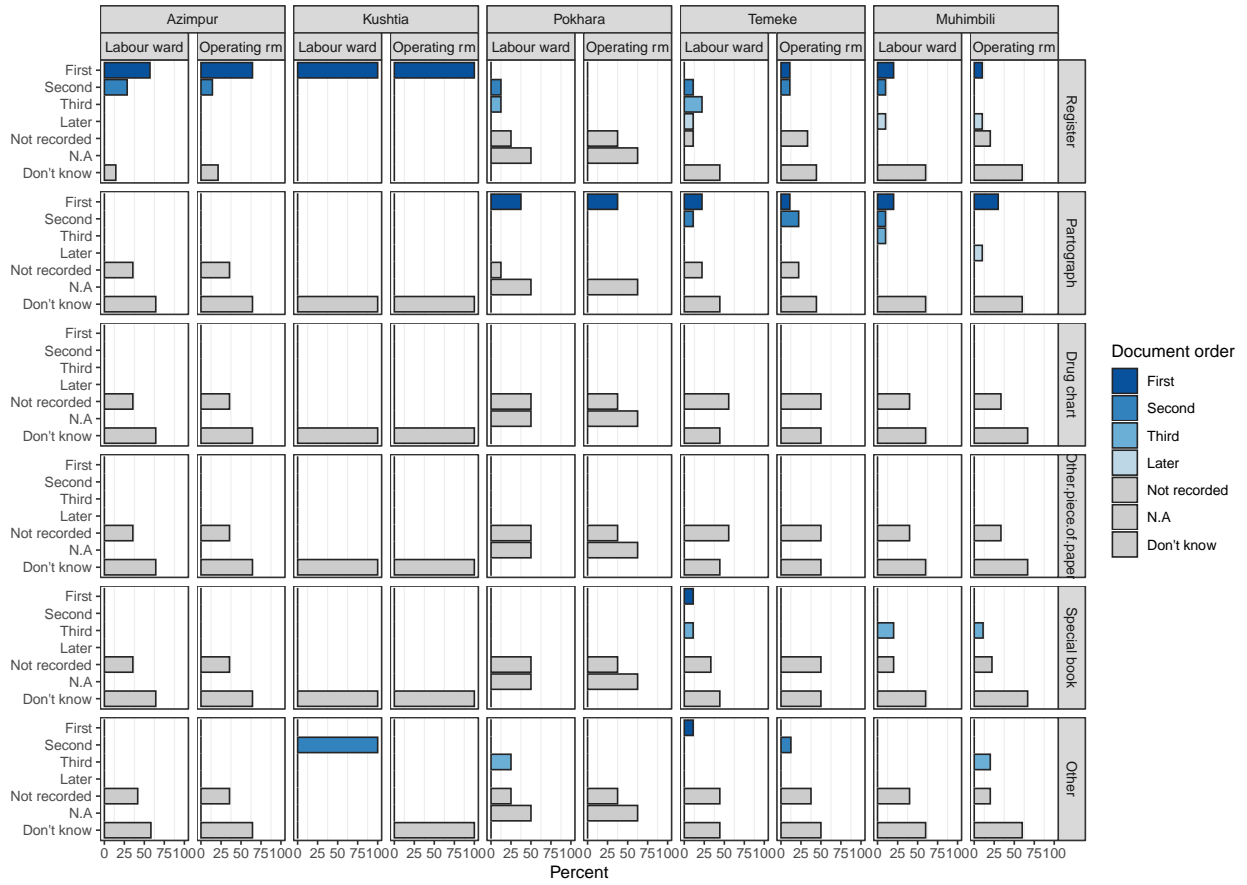

Supplement: MOESM16 [file 19010480]
