# Supplementary material for: Birthweight: EN-BIRTH multi-country validation study
Source: Springer Nature journal article supplement (doi:10.1186/s12884-020-03355-3), 2021-03-01
Supplement: MOESM17 [file 19010480]

*Every Newborn* BIRTH multi-country validation study: informing measurement of coverage and quality of maternal and newborn care

### **Birthweight: EN-BIRTH multi-country validation study**

Additional File 17: EN-BIRTH interview results with data collectors and health workers on estimated time to complete documentation

|         | <b>Azimpur<br/>Tertiary</b> | <b>Kushtia<br/>District</b> | <b>Muhimbili<br/>Regional</b> | <b>Temeke<br/>Regional</b> | <b>Pokhara<br/>National</b> |
|---------|-----------------------------|-----------------------------|-------------------------------|----------------------------|-----------------------------|
| Usually | 10                          | 31                          | 27                            | 34                         | 4                           |
| Minimum | 4                           | 18                          | 21                            | 28                         | 3                           |
| Maximum | 15                          | 54                          | 61                            | 197                        | 11                          |

Estimated time (minutes) between weighing and recording weight.
