# Supplementary material for: Birthweight: EN-BIRTH multi-country validation study
Source: Springer Nature journal article supplement (doi:10.1186/s12884-020-03355-3), 2021-03-01
Supplement: MOESM18 [file 19010480]

*Every Newborn* BIRTH multi-country validation study: informing measurement of coverage and quality of maternal and newborn care

### **Birthweight: EN-BIRTH multi-country validation study**

Additional File 18: Ethical Approval of Local Institutional Review Boards, EN-BIRTH Study

| <b>Teams by Country</b> | <b>Institutional Review Boards</b>                                                              | <b>Date</b> | <b>Number/Ref</b>          |
|-------------------------|-------------------------------------------------------------------------------------------------|-------------|----------------------------|
| UK                      | London School of Hygiene & Tropical Medicine (LSHTM)<br>Interventions Research Ethics Committee | 03.10.16    | 11780                      |
| Bangladesh              | Icddr,b Research review Committee                                                               | 11.08.16    | PR 16055                   |
|                         | Icddr,b ethical review committee                                                                | 14.11.16    |                            |
| Nepal                   | Nepal Health Research Council (NHRC)                                                            | 08.08.16    | 187/2016                   |
| Tanzania                | National Institute for Medical Research (NIMRI)                                                 | 20.01.17    | NIMR/HQ/R.8a/Vol IX/2394   |
|                         | Ifakara Health Institute                                                                        | 20.10.16    | IHI/IRB/No: 032-2016       |
|                         | Muhimbili University of Health and Allied Sciences<br>Research and Publications committee       | 21.10.16    | 2016-10-21-/AEC/Vol.XI/310 |

Voluntary informed consent was obtained from all participants and their care providers. All women were provided with a description of the study procedures in their preferred language at admission, and offered the right to refuse, or withdraw consent at any time during the study. Facility staff were identified before data collection began and approached for recruitment and consent. No health worker refused participation and all maintained the right to withdraw throughout the study. Facility staff were identified before data collection began and approached for recruitment and consent. No health worker refused participation and all maintained the right to withdraw throughout the study.

This study was granted ethical approval by institutional review boards in all operating counties in addition to the London School of Hygiene & Tropical Medicine.
